# Supplementary material for: VEGF and Other Gene Therapies Improve Flap Survival—A Systematic Review and Meta-Analysis of Preclinical Studies
Source: MDPI journal article supplement (doi:10.3390/ijms25052622), 2024-02-23
Supplement: s1 [file s1]

**Table S1.** PRISMA checklist.

| Section and Topic             | Item # | Checklist item                                                                                                                                                                                                                                                                                       | Location where item is reported |
|-------------------------------|--------|------------------------------------------------------------------------------------------------------------------------------------------------------------------------------------------------------------------------------------------------------------------------------------------------------|---------------------------------|
| <b>TITLE</b>                  |        |                                                                                                                                                                                                                                                                                                      |                                 |
| Title                         | 1      | Identify the report as a systematic review.                                                                                                                                                                                                                                                          | 1                               |
| <b>ABSTRACT</b>               |        |                                                                                                                                                                                                                                                                                                      |                                 |
| Abstract                      | 2      | See the PRISMA 2020 for Abstracts checklist.                                                                                                                                                                                                                                                         | 2                               |
| <b>INTRODUCTION</b>           |        |                                                                                                                                                                                                                                                                                                      |                                 |
| Rationale                     | 3      | Describe the rationale for the review in the context of existing knowledge.                                                                                                                                                                                                                          | 3-4                             |
| Objectives                    | 4      | Provide an explicit statement of the objective(s) or question(s) the review addresses.                                                                                                                                                                                                               | 3-4                             |
| <b>METHODS</b>                |        |                                                                                                                                                                                                                                                                                                      |                                 |
| Eligibility criteria          | 5      | Specify the inclusion and exclusion criteria for the review and how studies were grouped for the syntheses.                                                                                                                                                                                          | 5-8                             |
| Information sources           | 6      | Specify all databases, registers, websites, organisations, reference lists and other sources searched or consulted to identify studies. Specify the date when each source was last searched or consulted.                                                                                            | 5                               |
| Search strategy               | 7      | Present the full search strategies for all databases, registers and websites, including any filters and limits used.                                                                                                                                                                                 | 5 (available from PROSPERO)     |
| Selection process             | 8      | Specify the methods used to decide whether a study met the inclusion criteria of the review, including how many reviewers screened each record and each report retrieved, whether they worked independently, and if applicable, details of automation tools used in the process.                     | 6                               |
| Data collection process       | 9      | Specify the methods used to collect data from reports, including how many reviewers collected data from each report, whether they worked independently, any processes for obtaining or confirming data from study investigators, and if applicable, details of automation tools used in the process. | 6-7                             |
| Data items                    | 10a    | List and define all outcomes for which data were sought. Specify whether all results that were compatible with each outcome domain in each study were sought (e.g. for all measures, time points, analyses), and if not, the methods used to decide which results to collect.                        | 6-7                             |
|                               | 10b    | List and define all other variables for which data were sought (e.g. participant and intervention characteristics, funding sources). Describe any assumptions made about any missing or unclear information.                                                                                         | 6-7                             |
| Study risk of bias assessment | 11     | Specify the methods used to assess risk of bias in the included studies, including details of the tool(s) used, how many reviewers assessed each study and whether they worked independently, and if applicable, details of automation tools used in the process.                                    | 8                               |

| Section and Topic             | Item # | Checklist item                                                                                                                                                                                                                                                                       | Location where item is reported      |
|-------------------------------|--------|--------------------------------------------------------------------------------------------------------------------------------------------------------------------------------------------------------------------------------------------------------------------------------------|--------------------------------------|
| Effect measures               | 12     | Specify for each outcome the effect measure(s) (e.g. risk ratio, mean difference) used in the synthesis or presentation of results.                                                                                                                                                  | 7-8                                  |
| Synthesis methods             | 13a    | Describe the processes used to decide which studies were eligible for each synthesis (e.g. tabulating the study intervention characteristics and comparing against the planned groups for each synthesis (item #5)).                                                                 | 7                                    |
|                               | 13b    | Describe any methods required to prepare the data for presentation or synthesis, such as handling of missing summary statistics, or data conversions.                                                                                                                                | 6-7                                  |
|                               | 13c    | Describe any methods used to tabulate or visually display results of individual studies and syntheses.                                                                                                                                                                               | 7-8                                  |
|                               | 13d    | Describe any methods used to synthesize results and provide a rationale for the choice(s). If meta-analysis was performed, describe the model(s), method(s) to identify the presence and extent of statistical heterogeneity, and software package(s) used.                          | 7-8                                  |
|                               | 13e    | Describe any methods used to explore possible causes of heterogeneity among study results (e.g. subgroup analysis, meta-regression).                                                                                                                                                 | 7-8                                  |
|                               | 13f    | Describe any sensitivity analyses conducted to assess robustness of the synthesized results.                                                                                                                                                                                         | 7-8                                  |
| Reporting bias assessment     | 14     | Describe any methods used to assess risk of bias due to missing results in a synthesis (arising from reporting biases).                                                                                                                                                              | 8                                    |
| Certainty assessment          | 15     | Describe any methods used to assess certainty (or confidence) in the body of evidence for an outcome.                                                                                                                                                                                | 8                                    |
| <b>RESULTS</b>                |        |                                                                                                                                                                                                                                                                                      |                                      |
| Study selection               | 16a    | Describe the results of the search and selection process, from the number of records identified in the search to the number of studies included in the review, ideally using a flow diagram.                                                                                         | 9                                    |
|                               | 16b    | Cite studies that might appear to meet the inclusion criteria, but which were excluded, and explain why they were excluded.                                                                                                                                                          | 12 (not included into meta-analysis) |
| Study characteristics         | 17     | Cite each included study and present its characteristics.                                                                                                                                                                                                                            | 10-13                                |
| Risk of bias in studies       | 18     | Present assessments of risk of bias for each included study.                                                                                                                                                                                                                         | 13, Table S6                         |
| Results of individual studies | 19     | For all outcomes, present, for each study: (a) summary statistics for each group (where appropriate) and (b) an effect estimate and its precision (e.g. confidence/credible interval), ideally using structured tables or plots.                                                     | 10-13, Table S2, S3                  |
| Results of syntheses          | 20a    | For each synthesis, briefly summarise the characteristics and risk of bias among contributing studies.                                                                                                                                                                               | 10-13                                |
|                               | 20b    | Present results of all statistical syntheses conducted. If meta-analysis was done, present for each the summary estimate and its precision (e.g. confidence/credible interval) and measures of statistical heterogeneity. If comparing groups, describe the direction of the effect. | 10-13                                |

| Section and Topic                              | Item # | Checklist item                                                                                                                                                                                                                             | Location where item is reported      |
|------------------------------------------------|--------|--------------------------------------------------------------------------------------------------------------------------------------------------------------------------------------------------------------------------------------------|--------------------------------------|
|                                                | 20c    | Present results of all investigations of possible causes of heterogeneity among study results.                                                                                                                                             | 10-13, 14-16                         |
|                                                | 20d    | Present results of all sensitivity analyses conducted to assess the robustness of the synthesized results.                                                                                                                                 | 10-11                                |
| Reporting biases                               | 21     | Present assessments of risk of bias due to missing results (arising from reporting biases) for each synthesis assessed.                                                                                                                    | 10-13                                |
| Certainty of evidence                          | 22     | Present assessments of certainty (or confidence) in the body of evidence for each outcome assessed.                                                                                                                                        | 10-13                                |
| <b>DISCUSSION</b>                              |        |                                                                                                                                                                                                                                            |                                      |
| Discussion                                     | 23a    | Provide a general interpretation of the results in the context of other evidence.                                                                                                                                                          | 4,14 (first summary of primary data) |
|                                                | 23b    | Discuss any limitations of the evidence included in the review.                                                                                                                                                                            | 17-18                                |
|                                                | 23c    | Discuss any limitations of the review processes used.                                                                                                                                                                                      | 17-18                                |
|                                                | 23d    | Discuss implications of the results for practice, policy, and future research.                                                                                                                                                             | 16                                   |
| <b>OTHER INFORMATION</b>                       |        |                                                                                                                                                                                                                                            |                                      |
| Registration and protocol                      | 24a    | Provide registration information for the review, including register name and registration number, or state that the review was not registered.                                                                                             | 5                                    |
|                                                | 24b    | Indicate where the review protocol can be accessed, or state that a protocol was not prepared.                                                                                                                                             | 5                                    |
|                                                | 24c    | Describe and explain any amendments to information provided at registration or in the protocol.                                                                                                                                            | 7                                    |
| Support                                        | 25     | Describe sources of financial or non-financial support for the review, and the role of the funders or sponsors in the review.                                                                                                              | 1                                    |
| Competing interests                            | 26     | Declare any competing interests of review authors.                                                                                                                                                                                         | 1                                    |
| Availability of data, code and other materials | 27     | Report which of the following are publicly available and where they can be found: template data collection forms; data extracted from included studies; data used for all analyses; analytic code; any other materials used in the review. | 1                                    |

**List S1.** Changes made to group counts to avoid multiplicity.

1. Fujihara 2005b, Ferraro 2009 – vector changed from “plasmid+electroporation” to “plasmid”
2. Basu 2014c and Basu 2014d – vector changed from “plasmid+multielectrode array” to “plasmid”
3. Chang 2021a, Chang 2021b, Rah 2014, Lee 2011 – changed flap type from “McFarlane, modified” to “McFarlane”
4. Michlits 2007, O'Toole 2002, Gurunluoglu 2002 – changed flap type from “epigastric, modified” to “epigastric”
5. Hijjawi 2004a,b – split control group count into 3 and 4 (original 7)
6. Rinsch 2001a – changed drug from “VEGF-121” to “VEGF”
7. Taub 1998 - changed drug from “VEGF-121” to “VEGF”
8. O'Toole 2002 - changed drug from “VEGF-167, -186” to “VEGF”
9. Gurunluoglu 2002a – changed drug from “VEGF-164, -166, -167” to “VEGF”
10. Jafari 2017 – control group count split into 2 and 3 from original 5
11. Liu 2009 – control group count split into 3x3 from original 9
12. Giunta 2005 – c and d pooled together (same parameters), control group in a,b,c – 2 each (original 6)
13. Rinsch 2001 a,b – control group count split into 7 and 8 (original 15).
14. Spanholtz 2009 – control group count split into 13,13,14 (original 40)
15. O'Toole 2002 – control group count split into 3,4,4 (original 11)

**Figure S1.** VEGF comparison by vectors excluding studies at a high risk of bias.

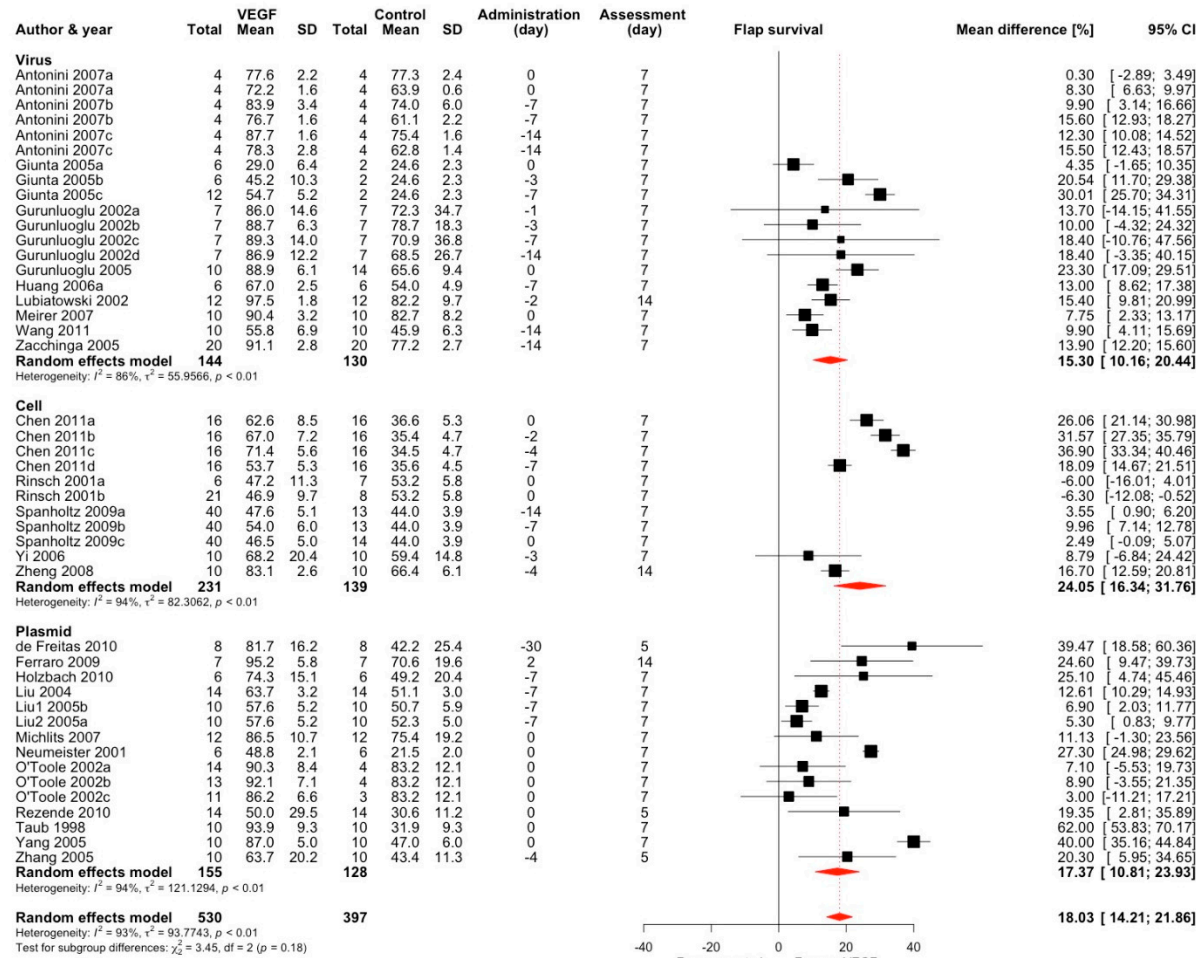

**Figure S2.** VEGF comparison by vector excluding studies with approximated data extracted from figures.

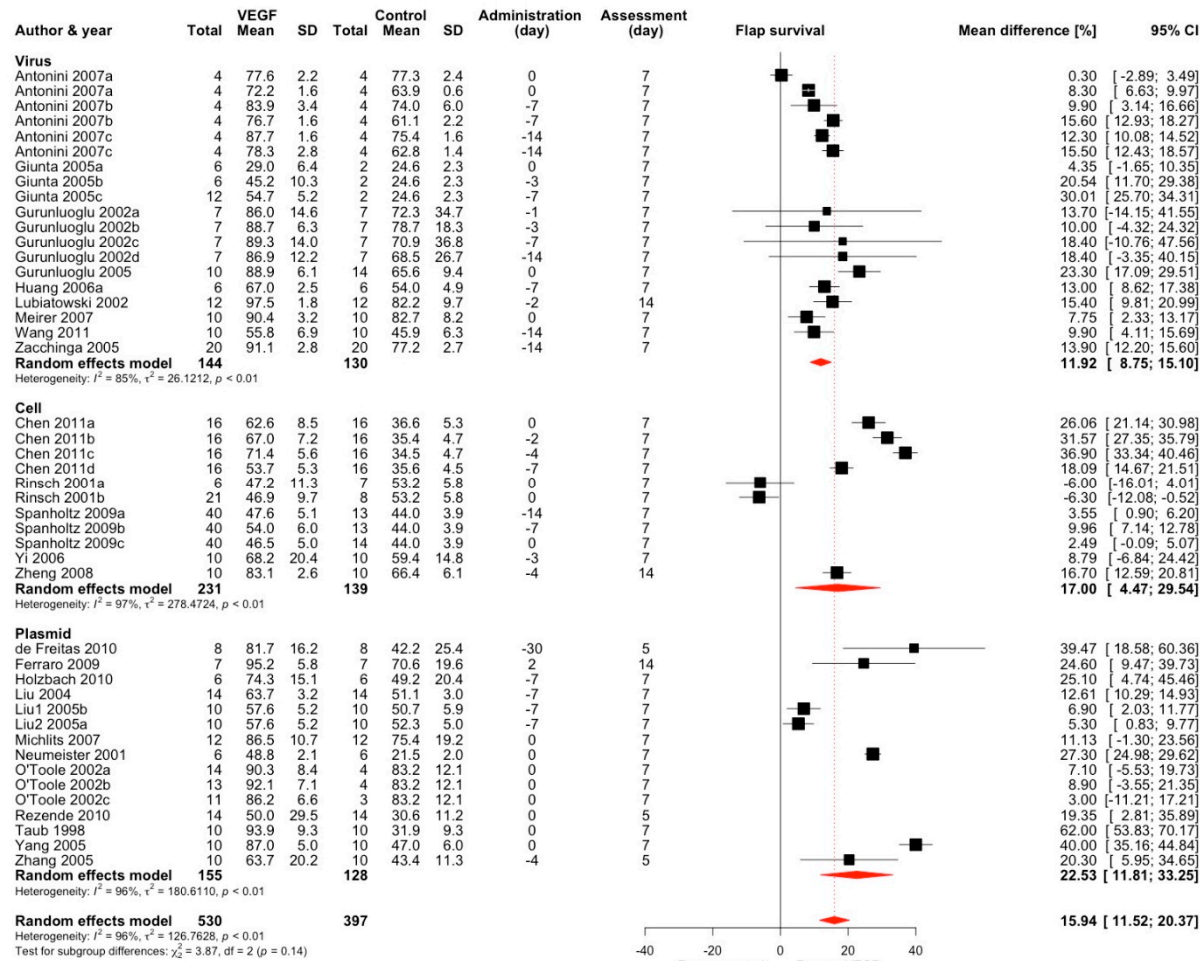

Figure S3. VEGF comparison using both random effects and fixed effect models.

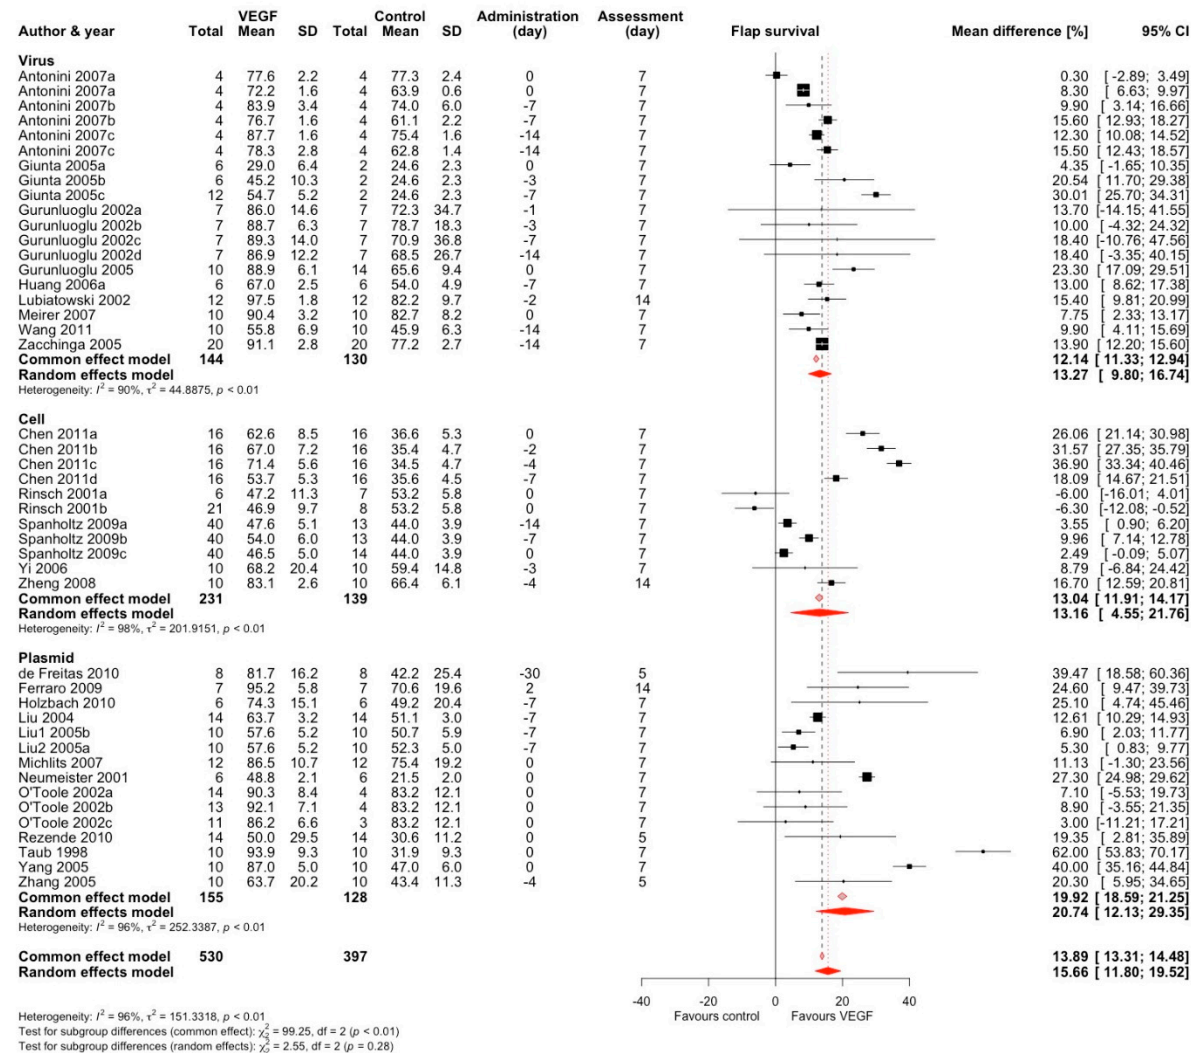



**Figure S4.** VEGF comparison by flap excluding studies with approximated data extracted from figures.

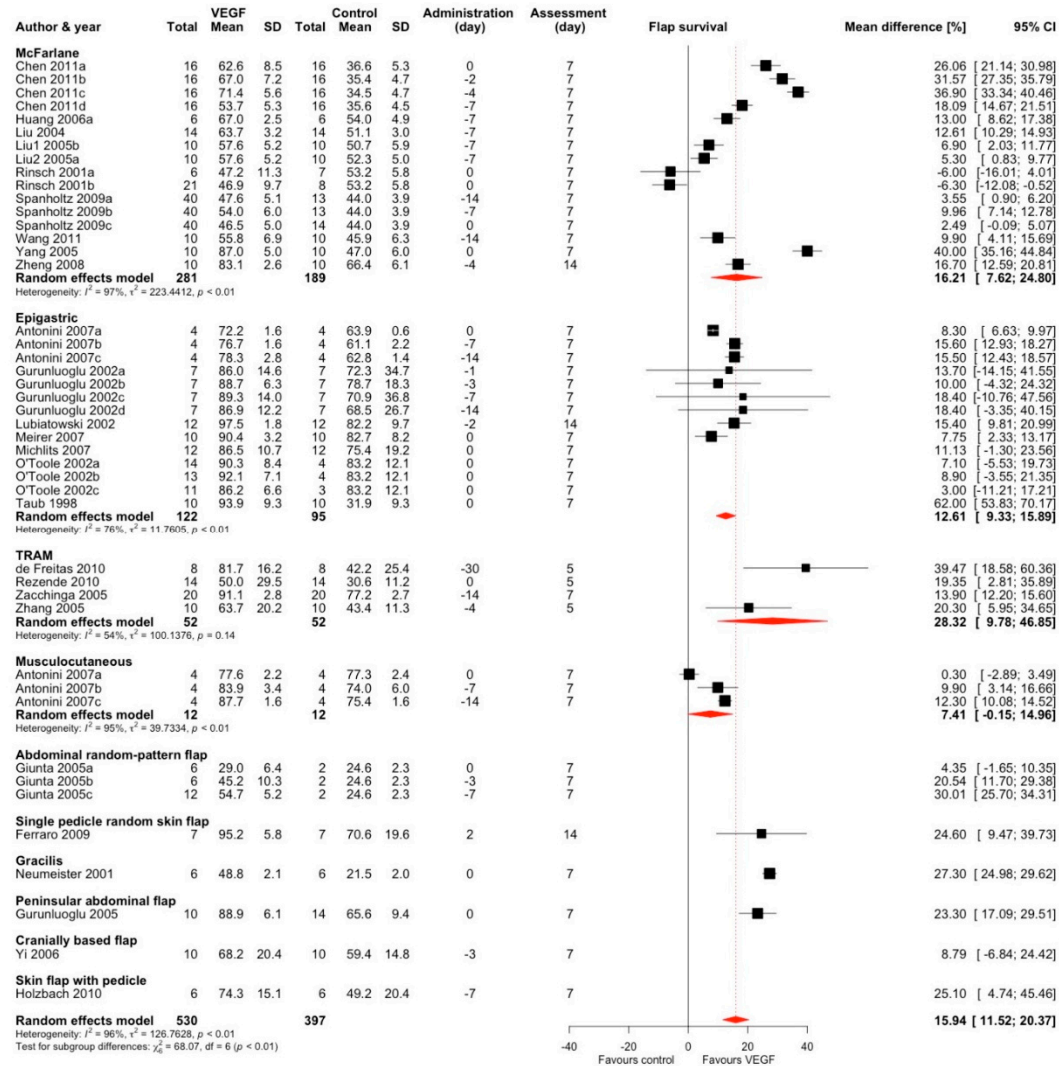



**Figure S5.** VEGF comparison by flap type with both random effects and fixed effect model.

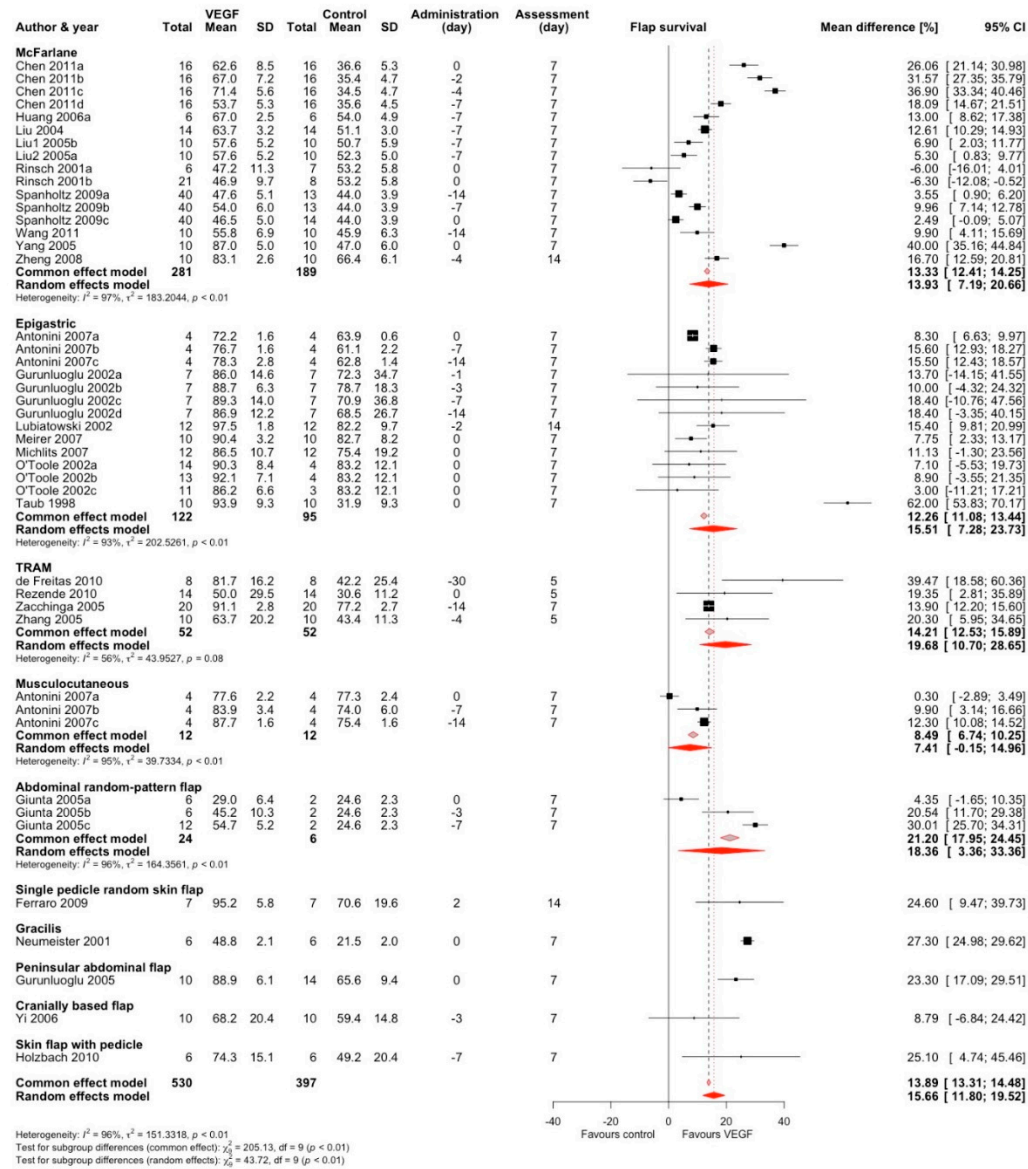

**Figure S6.** VEGF comparison by administration route.

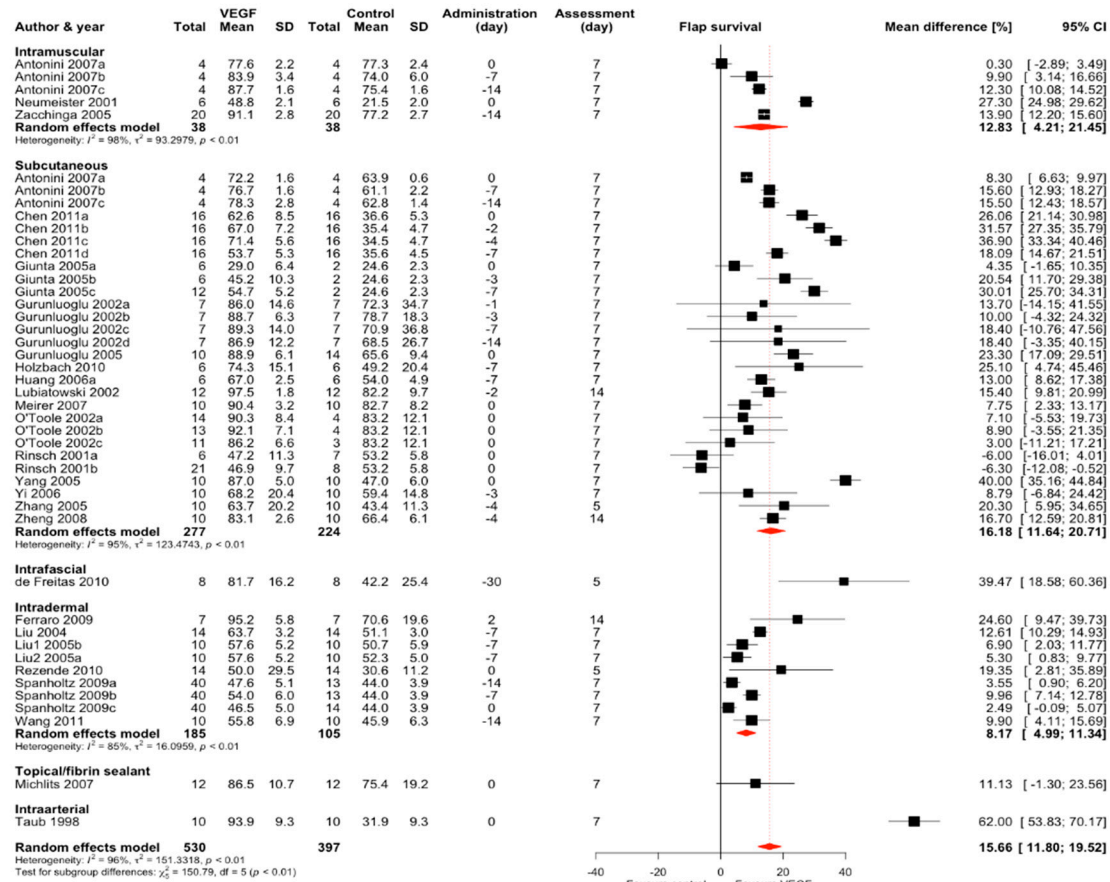

**Table S2.** Multivariate meta-regression model for VEGF intervention.

| Variable                               | Effect estimate (95% confidence interval) | p-value      |
|----------------------------------------|-------------------------------------------|--------------|
| Assessment time                        | 0.61 (-1.19 to 2.42)                      | 0.51         |
| Administration time                    | -0.42 (-1.21 to 0.37)                     | 0.29         |
| Plasmid (vector) <sup>a</sup>          | 6.19 (-3.13 to 15.52)                     | 0.19         |
| Virus (vector) <sup>a</sup>            | -2.32 (-10.99 to 6.34)                    | 0.60         |
| Intramuscular (RoD) <sup>b</sup>       | 6.90 (-5.57 to 19.37)                     | 0.28         |
| <b>Subcutaneous (RoD) <sup>b</sup></b> | <b>11.00 (1.47 to 20.53)</b>              | <b>0.024</b> |

RoD – route of administration; <sup>a</sup>– reference: cell (vector); <sup>b</sup> – reference: intradermal (RoD)

**Figure S7.** Funnel plot regarding publication bias showing VEGF intervention group.

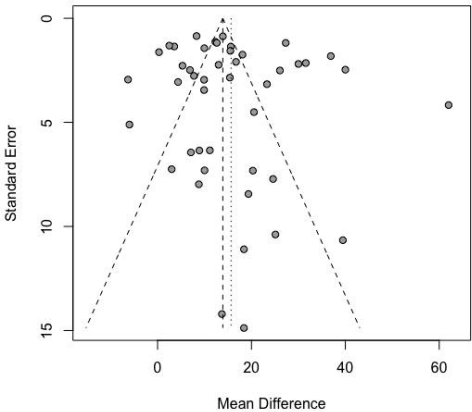

**VEGF**

|           |              |       |           |
|-----------|--------------|-------|-----------|
| intercept | 95% CI       | t     | p         |
| 1.192     | -1.33 - 3.72 | 0.926 | 0.3597875 |

Eggers' test does not indicate the presence of funnel plot asymmetry.

**Figure S8.** FGF comparison by vector excluding studies at a high risk of bias.

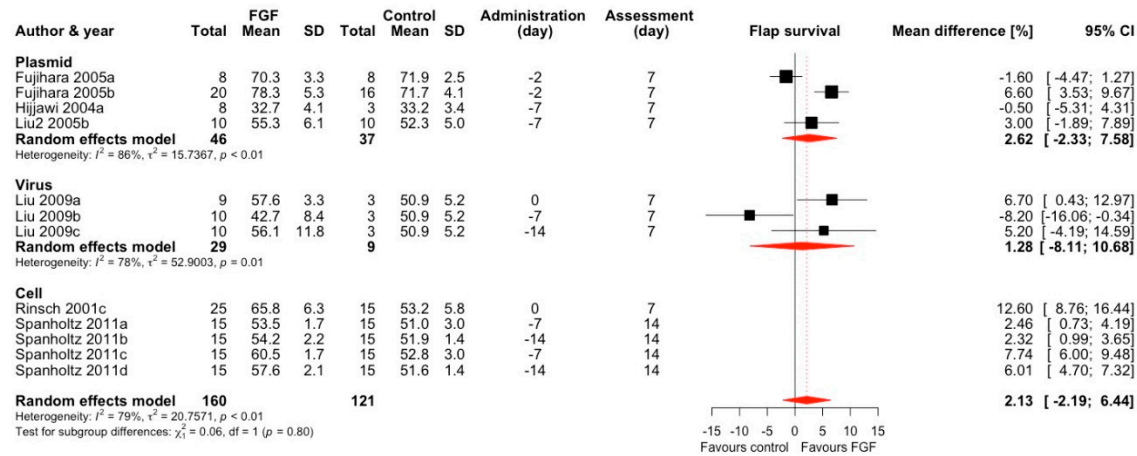

**Figure S9.** FGF comparison by vector excluding studies with data approximated from figures.

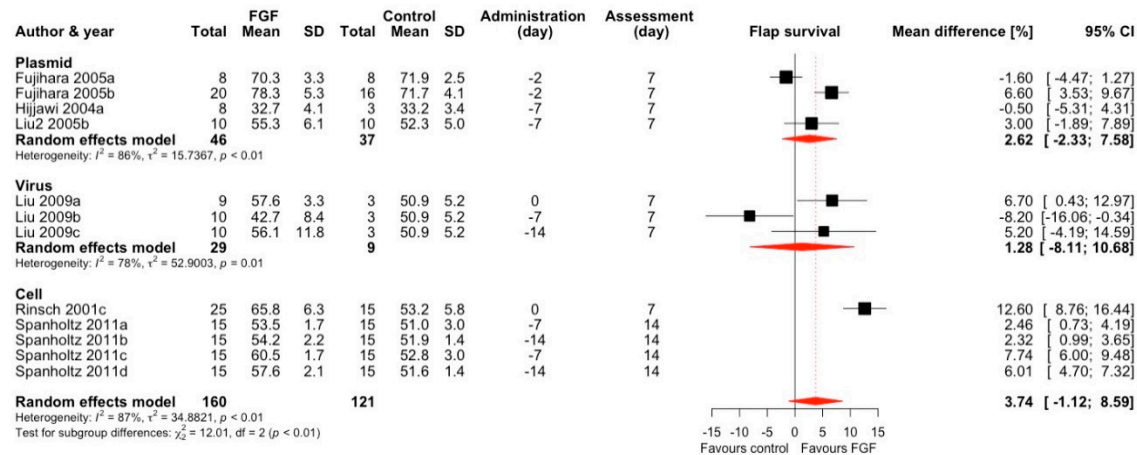

**Figure S10.** Funnel plot regarding publication bias showing FGF intervention group.

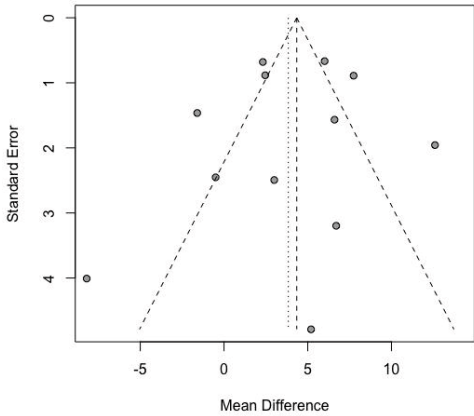

**FGF**

| intercept | 95% CI       | t      | p         |
|-----------|--------------|--------|-----------|
| -0.578    | -3.68 - 2.53 | -0.365 | 0.7230062 |

Eggers' test does not indicate the presence of funnel plot asymmetry.

Figure S11. PDGF comparison by vector excluding studies at a high risk of bias.

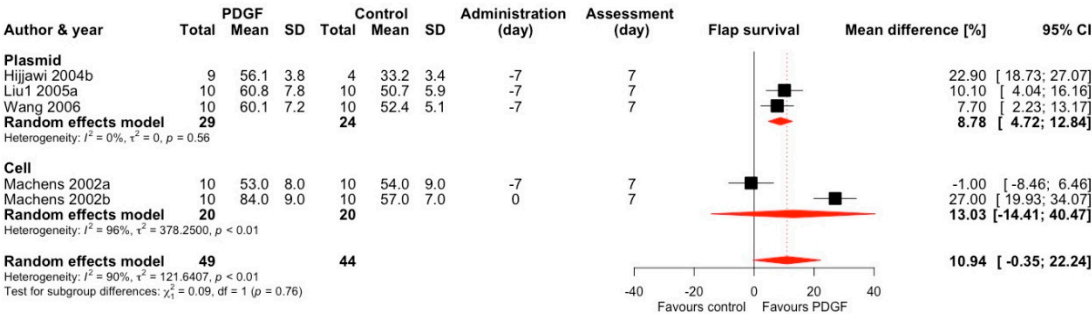

Figure S12. PDGF comparison by vector excluding studies with data approximated from figures.

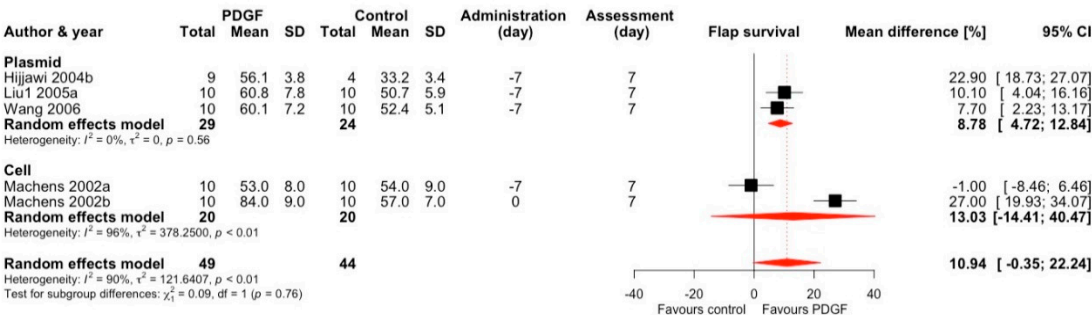

Figure S13. PDGF comparison by vector using both random effects and fixed effect models.

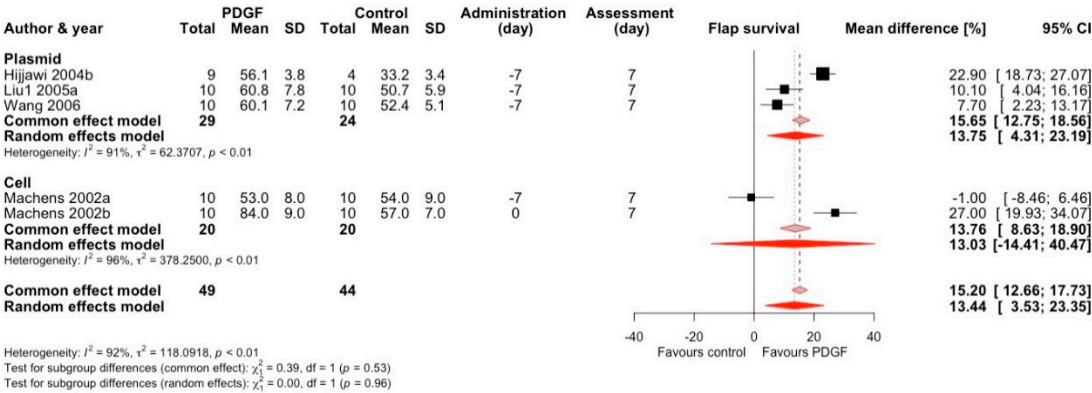

Figure S14. PDGF comparison by flap excluding studies at a high risk of bias.

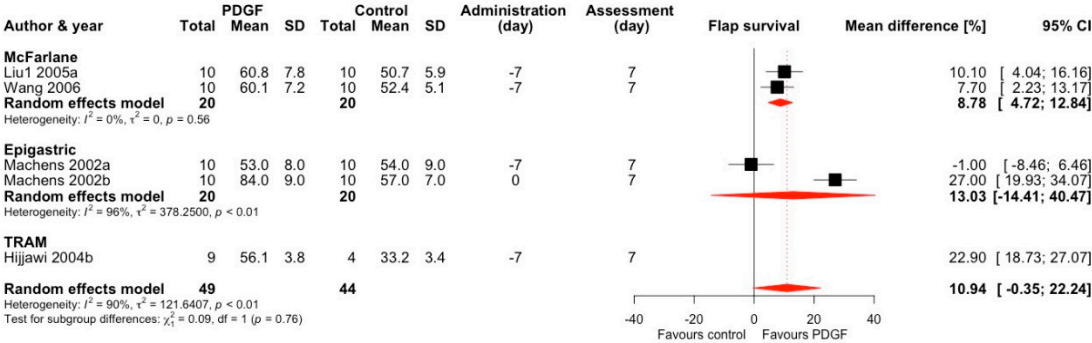



Figure S15. PDGF comparison by flap type excluding studies with data approximated from figures.

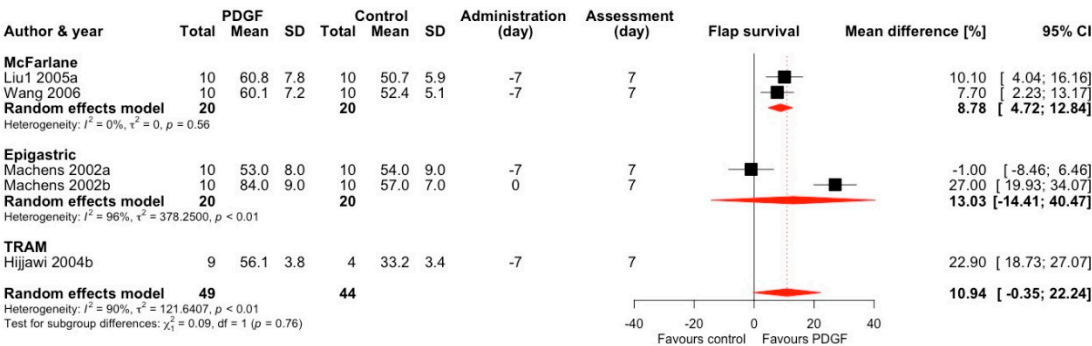

Figure S16. PDGF comparison by flap using both random effects and fixed effect models.

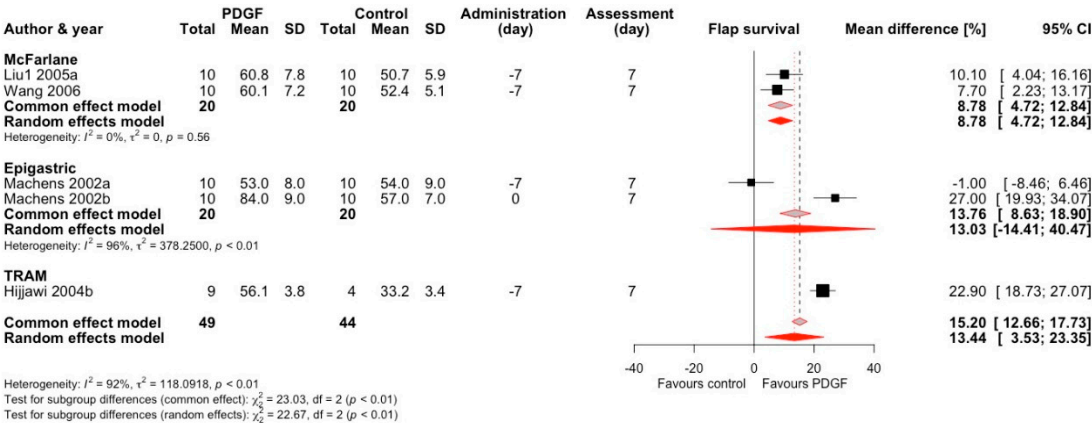

**Table S3.** Overview of studies included in secondary outcome analysis.

| 1st Author;<br>Year | Target<br>gene             | Focus                                                                                                              | Vector<br>amount                                                           | Experimental groups                                                                                                                                                                                          | Outcome                                                                                                   | Follow-<br>up | Flap model                                                          | Animal<br>number                                               | Surgical technique                                                                                                                                                                                                                                      | Secondary outcomes (with P values)                                                                                                                                                                        |
|---------------------|----------------------------|--------------------------------------------------------------------------------------------------------------------|----------------------------------------------------------------------------|--------------------------------------------------------------------------------------------------------------------------------------------------------------------------------------------------------------|-----------------------------------------------------------------------------------------------------------|---------------|---------------------------------------------------------------------|----------------------------------------------------------------|---------------------------------------------------------------------------------------------------------------------------------------------------------------------------------------------------------------------------------------------------------|-----------------------------------------------------------------------------------------------------------------------------------------------------------------------------------------------------------|
| Neumeister;<br>2001 | VEGF-165                   | Increasing viability<br>of flaps                                                                                   | 50 µl                                                                      | (A) lipofectamine and VEGF plas-<br>mid (n=6),<br>(B) lipofectamine (n=6)                                                                                                                                    | Capillary-to-<br>muscle fiber<br>ratio                                                                    | 7 days        | gracilis mus-<br>cle microcir-<br>culation<br>model                 | 12 Wistar<br>male rats<br>(300-<br>325g)                       | Intramuscular injection at the<br>end of 4-hours of ischemia in-<br>duced by microvascular clamp<br>of main femoral vessels                                                                                                                             | (A) 1.16±0.09<br>(B) 0.48±0.07<br>P<0.05 (A) vs. (B)                                                                                                                                                      |
| Liu; 2005           | PDGF-B<br>VEGF             | Increasing survival<br>and vascularity of<br>the ischemic flap                                                     | 50 mg                                                                      | (A) PDGF plasmid (n=10)<br>(B) saline (n=10),<br>(C) empty plasmid (n=10)<br>(D) VEGF plasmid (n=10)                                                                                                         | Flap vascular-<br>ity (blood<br>vessel den-<br>sity)                                                      | 7 days        | Caudally-<br>based ran-<br>dom pattern<br>McFarlane<br>flap, 3x10cm | 45 Spra-<br>gue-Daw-<br>ley fe-<br>male rats<br>(250-<br>300g) | Intradermal injection (7 days<br>before flap elevation).                                                                                                                                                                                                | The density of blood vessels:<br>(A) 6.8±3.4<br>(C) 3.8±2.6<br>P<0.05                                                                                                                                     |
| Liu; 2004           | VEGF-165                   | Increasing flap sur-<br>vival and angiogen-<br>esis around flap                                                    | 50 mg                                                                      | (A) VEGF plasmid (n=14)<br>(B) saline (n=4)<br>(C) Lac-Z plasmid (n=14)                                                                                                                                      | Neovasculari-<br>zation                                                                                   | 7 days        | Random<br>pattern<br>McFarlane<br>flap, 3x10cm                      | 32 Spra-<br>gue-Daw-<br>ley fe-<br>male rats<br>(250g)         | Intradermal injection (7 days<br>prior to flap elevation).                                                                                                                                                                                              | Blood vessel counts (n/hpf)<br>(C) – 6.0<br>(A) - 13.9<br>P<0.001                                                                                                                                         |
| Liu; 2005           | VEGF-165<br>PDGF-B<br>bFGF | Enhancement of<br>survival of ischemic<br>skin flaps                                                               | 50 µg                                                                      | (A) VEGF165 plasmid (n=10)<br>(B) bFGF plasmid (n=10)<br>(C) VEGF, bFGF plasmid (n=10)<br>(D) VEGF165, PDGF-B plasmid<br>(n=10)<br>(E) VEGF165, bFGF, PDGF-B plas-<br>mid (n=10)<br>(F) Empty plasmid (n=10) | Neovasculari-<br>zation<br><br>Transfection<br>efficiency                                                 | 7 days        | Random<br>pattern<br>McFarlane<br>flap, 3x10cm                      | 60 Spra-<br>gue-Daw-<br>ley fe-<br>male rats<br>(250-<br>300g) | Intradermal injection (7 days<br>prior to flap elevation)                                                                                                                                                                                               | Blood vessel counts (n/hpf)<br>(A) - 13.6±3.2<br>(B) – 7.2±2.7<br>(C) – 12.0±4.0<br>(D) – 14.0±5.0<br>(E) – 35.1±10.8<br>(F) – 6.3±2.3<br>All P<0.05                                                      |
| Huang; 2006         | VEGF-165<br>eNOS           | Increasing skin flap<br>viability, increasing<br>synthesis/release of<br>the angiogenic and<br>vasodilator factors | VEGF:<br>5 x 10 <sup>8</sup><br>PFU<br>eNOS:<br>5 x 10 <sup>8</sup><br>PFU | (A) PBS (n=6)<br>(B) PBS+ empty virus (n=6)<br>(C) PBS+ VEGF virus (n=6)<br>(D) PBS+ eNOS virus (n=6)                                                                                                        | Capillary<br>density<br><br>Protein ex-<br>pression<br><br>Effect of inhi-<br>bition by in-<br>domethacin | 7 days        | dorsal ran-<br>dom-pattern<br>skin flap,<br>4x10cm                  | 24 Spra-<br>gue-Daw-<br>ley male<br>rats (350-<br>375g)        | Syringe fitted with a 30-gauge<br>needle and injected subder-<br>mally into the distal half of the<br>skin flap 7 days before surgery.<br>The injections were spaced 0.5<br>cm apart along both sides of the<br>midline, at 1 cm from the mid-<br>line. | Capillary density (vessels/mm2)<br>7h prior to elevation:<br>(A) 20<br>(B) 18<br>(C) 30 (P<0.05)<br><br>Skin blood flow (ml/min) 9h post<br>elevation:<br>(A) 0.21±0.04<br>(B) 0.20±0.02<br>(C) 0.43±0.06 |

|                  |          |                                           |                       |                                                |                             |         |                                                                 |                                          |                                                                                                                                                                |                                                |  |
|------------------|----------|-------------------------------------------|-----------------------|------------------------------------------------|-----------------------------|---------|-----------------------------------------------------------------|------------------------------------------|----------------------------------------------------------------------------------------------------------------------------------------------------------------|------------------------------------------------|--|
| Rah; 2014        | HGF      | Enhancement of flap survival              | 1x10 <sup>7</sup> PFU | (A) HGF-virus (n=10)                           | Ratio of blood flow         | 10 days | Dorsal skin flap with pan-gue-Daw-niculus car-nosus, 3x9cm      | 30 Sprague-Dawley male rats (300-350g)   | Injections made into the subdermal layer of the entire area of the skin flap (8 injections) 2 days before flap elevation and immediately after flap elevation. | P<0.05                                         |  |
|                  |          |                                           |                       | (B) 500ng recombinant HGF (n=10)               |                             |         |                                                                 |                                          |                                                                                                                                                                | Blood flow (perfusion units):                  |  |
|                  |          |                                           |                       | (C) PBS (n=10)                                 |                             |         |                                                                 |                                          |                                                                                                                                                                | Mid-distal flap (7/10 day post-op):            |  |
|                  |          |                                           |                       |                                                |                             |         |                                                                 |                                          |                                                                                                                                                                | (A) - 0.56±0.27 0.71±0.35                      |  |
|                  |          |                                           |                       |                                                | CD31-positive vessels count |         |                                                                 |                                          |                                                                                                                                                                | P=0.028                                        |  |
|                  |          |                                           |                       |                                                | VEGF expression             |         |                                                                 |                                          |                                                                                                                                                                | Distal flap (3/7day post-op):                  |  |
|                  |          |                                           |                       |                                                |                             |         |                                                                 |                                          |                                                                                                                                                                | (A) - 0.56±0.50                                |  |
|                  |          |                                           |                       |                                                |                             |         |                                                                 |                                          |                                                                                                                                                                | 0.35±0.47                                      |  |
|                  |          |                                           |                       |                                                |                             |         |                                                                 |                                          |                                                                                                                                                                | P = 0.017                                      |  |
|                  |          |                                           |                       |                                                |                             |         |                                                                 |                                          |                                                                                                                                                                | CD31-positive vessels count (10 days post-op): |  |
|                  |          |                                           |                       |                                                |                             |         |                                                                 |                                          |                                                                                                                                                                | (A) - 8.7±2.91                                 |  |
|                  |          |                                           |                       |                                                |                             |         |                                                                 |                                          |                                                                                                                                                                | (B) – 5.8±0.80                                 |  |
|                  |          |                                           |                       |                                                |                             |         |                                                                 |                                          |                                                                                                                                                                | (C) – 3.8±0.76                                 |  |
|                  |          |                                           |                       |                                                |                             |         |                                                                 |                                          |                                                                                                                                                                | P = 0.037 for (A) vs. (B/C)                    |  |
| de Freitas; 2010 | VEGF-165 | Stimulation of neovascularization in flap | 100 µg                | (A) TRAM flap (n=8)                            | Neovascularization          | 5 days  | Transverse rectus abdominis musculocutaneous flap (TRAM), 3x5cm | 32 Wistar male rats (350-400g)           | Into fascia. Flap was constructed 30 days after abdominoplasty. During abdominoplasty 4x25ug plasmid treatment, electroporation soon after.                    | Mean number of vessels (in field):             |  |
|                  |          |                                           |                       | (B) TRAM flap + abdominoplasty + PBS (n=8)     |                             |         |                                                                 |                                          |                                                                                                                                                                | (A) – 3.91±1.80                                |  |
|                  |          |                                           |                       | (C) TRAM +abdominoplasty + empty plasmid (n=8) |                             |         |                                                                 |                                          |                                                                                                                                                                | (B) - 1.76±1.28                                |  |
|                  |          |                                           |                       | (D) TRAM +abdominoplasty + VEGF plasmid (n=8)  |                             |         |                                                                 |                                          |                                                                                                                                                                | (C) - 1.81±1.06 (D) - 4.70±1.99                |  |
|                  |          |                                           |                       |                                                |                             |         |                                                                 |                                          |                                                                                                                                                                | P<0.01 for (D) vs. (B/C) but not (A)           |  |
| Yang; 2005       | VEGF-121 | Increasing skin flap survival             | 80 µg                 | (A) VEGF plasmid (n=10)                        | Flap survival               | 7 days  | McFarlane flap,8x2cm                                            | 30 Sprague-Dawley female rats (280-320g) | Intramuscular (directly into the panniculus carnosus of the flap in 2 sites per flap).                                                                         | RBC count (x10 <sup>4</sup> )                  |  |
|                  |          |                                           |                       | (B) empty plasmid (n=10)                       |                             |         |                                                                 |                                          |                                                                                                                                                                | (A) 9.46±0.87                                  |  |
|                  |          |                                           |                       | (C) saline (n=10)                              |                             |         |                                                                 |                                          |                                                                                                                                                                | (B) 4.28± 0.56                                 |  |
|                  |          |                                           |                       |                                                |                             |         |                                                                 |                                          |                                                                                                                                                                | (C) 3.96±0.42                                  |  |
|                  |          |                                           |                       |                                                | Gene expression             |         |                                                                 |                                          |                                                                                                                                                                | P<0.01 (A)vs(B/C)                              |  |
|                  |          |                                           |                       |                                                | Protein expression          |         |                                                                 |                                          |                                                                                                                                                                | VEGF expression                                |  |
|                  |          |                                           |                       |                                                | Vascular density            |         |                                                                 |                                          |                                                                                                                                                                | (A) 1.73±0.14                                  |  |
|                  |          |                                           |                       |                                                | RBC in the flap (SPECT)     |         |                                                                 |                                          |                                                                                                                                                                | (B) 0.75±0.08                                  |  |
|                  |          |                                           |                       |                                                |                             |         |                                                                 |                                          |                                                                                                                                                                | (C) 0.73±0.07 P<0.01 (A)vs(B/C)                |  |
|                  |          |                                           |                       |                                                |                             |         |                                                                 |                                          |                                                                                                                                                                | VEGF protein                                   |  |
|                  |          |                                           |                       |                                                |                             |         |                                                                 |                                          |                                                                                                                                                                | (A) 1.24±0.18                                  |  |
|                  |          |                                           |                       |                                                |                             |         |                                                                 |                                          |                                                                                                                                                                | (B) 0.83±0.15                                  |  |

|                 |                                   |                            |                                                                                                                                                                                                                                                                                                                                                                                                                                              |                                     |                                                                         |                                                               |                                     |                                                                                                                 |                                                                                                                                                                                                                                                                                      |                                                                                          |
|-----------------|-----------------------------------|----------------------------|----------------------------------------------------------------------------------------------------------------------------------------------------------------------------------------------------------------------------------------------------------------------------------------------------------------------------------------------------------------------------------------------------------------------------------------------|-------------------------------------|-------------------------------------------------------------------------|---------------------------------------------------------------|-------------------------------------|-----------------------------------------------------------------------------------------------------------------|--------------------------------------------------------------------------------------------------------------------------------------------------------------------------------------------------------------------------------------------------------------------------------------|------------------------------------------------------------------------------------------|
|                 |                                   |                            |                                                                                                                                                                                                                                                                                                                                                                                                                                              |                                     |                                                                         |                                                               |                                     |                                                                                                                 |                                                                                                                                                                                                                                                                                      | (C) 0.81±0.13<br>P<0.01(A)vs(B/C)                                                        |
|                 |                                   |                            |                                                                                                                                                                                                                                                                                                                                                                                                                                              |                                     |                                                                         |                                                               |                                     |                                                                                                                 |                                                                                                                                                                                                                                                                                      | Vessel number<br>(A) 276±30<br>(B) 154±25<br>(C) 148±27<br>P<0.01(A)vs(B/C)              |
|                 |                                   |                            |                                                                                                                                                                                                                                                                                                                                                                                                                                              |                                     |                                                                         |                                                               |                                     |                                                                                                                 |                                                                                                                                                                                                                                                                                      | Vessel density<br>(A) 0.044±0.005<br>(B) 0.021±0.002<br>(C) 0.019±0.002 P<0.01(A)vs(B/C) |
| Zacchigna; 2005 | VEGF-165 Increasing flap survival | 1.5 x 10 <sup>11</sup> PFU | Experiment 1<br>Epigastric flap (n=4 each)<br>(A) VEGF intra-op<br>(B) VEGF 7d pre-op<br>(C) VEGF14d pre-op<br>(D) LacZ intra-op<br>(E) LacZ 7d pre-op<br>(F) LacZ 14d pre-op<br><br>TRAM flap (n=4 each)<br>(G) VEGF, intra-op<br>(H) VEGF, 7d pre-op<br>(I) VEGF, 14d pre-op<br>(J) LacZ, intra-op<br>(K) LacZ, 7d pre-op<br>(L) LacZ 14d pre-op<br><br>Experiment 2<br>TRAM (n=20 each)<br>(AA) VEGF, 14d pre-op<br>(BB) lacZ, 14d pre-op | HE assessment (2 <sup>nd</sup> exp) | Exp 1: 7 days<br><br>Exp 2: 7 days (24 animals)<br>22 days (16 animals) | Epigastric flap, 5x8cm<br><br>TRAM flap, 5x8cm                | 88 Wistar male rats (250-300g)      | Direct 10 equally-spaced subcutaneous (epigastric flap) or intramuscular injection near perforator (TRAM flap). | Histology – in semi quantitative analysis (AA) flaps showed improved skin tissue quality (total score 11.9 vs 6.3 in (BB) vs 14.8 in normal skin)<br><br>CD31 – AA vs BB approx. 145 vs 60<br>(no of vessels)<br>a-SMA 45 vs 15 (no of arteries)<br>alleged p-values, p<0.05, p<0.05 |                                                                                          |
| Yi; 2006        | VEGF-165 Increasing flap survival | 5 x 10 <sup>5</sup> cells  | (A) transfected cells (n=10)<br>(B) non-transfected cells (n=10)<br>(C) culture medium (n=10)                                                                                                                                                                                                                                                                                                                                                | In vitro: MTT Assay<br><br>In vivo: | 28 days                                                                 | cranially based flap, with the flap base 0.5 cm caudal to the | 30 athymic nude mice, 8-16 week old | Subcutaneous injection of 0,5 ml 3 days prior to flap elevation.                                                | MTT Assay:<br>(A) 0.42±0.02<br>(B) 0.31±0.01 P<0.05<br><br>Adhesion:<br>(A) 12.7±0.6                                                                                                                                                                                                 |                                                                                          |

|                 |                                   |                           |                                                                                                                                                                                                                                                                                                                                                                                                                                                                                                                 |                                                                                                                     |        |                                  |                                          |                                                                                                                                                                                                                                                                                                                         |                                                                                                                                                                        |                                                                                                                                         |
|-----------------|-----------------------------------|---------------------------|-----------------------------------------------------------------------------------------------------------------------------------------------------------------------------------------------------------------------------------------------------------------------------------------------------------------------------------------------------------------------------------------------------------------------------------------------------------------------------------------------------------------|---------------------------------------------------------------------------------------------------------------------|--------|----------------------------------|------------------------------------------|-------------------------------------------------------------------------------------------------------------------------------------------------------------------------------------------------------------------------------------------------------------------------------------------------------------------------|------------------------------------------------------------------------------------------------------------------------------------------------------------------------|-----------------------------------------------------------------------------------------------------------------------------------------|
|                 |                                   |                           |                                                                                                                                                                                                                                                                                                                                                                                                                                                                                                                 | Plasma VEGF levels                                                                                                  |        | occipital neck line, 1.25x2.5 cm |                                          |                                                                                                                                                                                                                                                                                                                         |                                                                                                                                                                        | (B) 4.5±0.4<br>P<0.05                                                                                                                   |
|                 |                                   |                           |                                                                                                                                                                                                                                                                                                                                                                                                                                                                                                                 | Perfusion                                                                                                           |        |                                  |                                          |                                                                                                                                                                                                                                                                                                                         |                                                                                                                                                                        | In vivo:<br>serum VEGF lvl<br>(A) vs. (B) (345;581,432,210,30 pg/ml vs 30,25, 28, ,23, 20); significantly in 1,4,7 and 14 days (P<0.05) |
|                 |                                   |                           |                                                                                                                                                                                                                                                                                                                                                                                                                                                                                                                 |                                                                                                                     |        |                                  |                                          |                                                                                                                                                                                                                                                                                                                         |                                                                                                                                                                        | Flap perfusion<br>(A)>(B)>(C) significant differences in days 4,7,14,28                                                                 |
|                 |                                   |                           |                                                                                                                                                                                                                                                                                                                                                                                                                                                                                                                 |                                                                                                                     |        |                                  |                                          |                                                                                                                                                                                                                                                                                                                         |                                                                                                                                                                        | Capillaries/mm2<br>(A) 37<br>(B) 30<br>(C) 15                                                                                           |
|                 |                                   |                           |                                                                                                                                                                                                                                                                                                                                                                                                                                                                                                                 |                                                                                                                     |        |                                  |                                          |                                                                                                                                                                                                                                                                                                                         |                                                                                                                                                                        | P<0.05 for (A) vs.(B) and (B)vs. (C)                                                                                                    |
| Spanholtz; 2009 | VEGF-165 Increasing flap survival | 1 x 10 <sup>7</sup> cells | (A1) VEGF-FB, 14d prior flap elevation (n=5)<br>(A2) VEGF-FB, 7d prior flap elevation (n=5)<br>(A3) VEGF-FB, 0d prior flap elevation (n=10)<br>(B1) GFP-FB,14d pre-flap elevation (n=5)<br>(B2) GFP-FB, 7d pre-flap elevation (n=5)<br>(B3) GFP-FB, 0d prior flap elevation (n=10)<br>(C1) FB (nonmodified), 14d prior flap elevation (n=5)<br>(C2) FB (nonmodified), 7d prior flap elevation (n=5)<br>(C3) FB (nonmodified), 0d prior flap elevation (n=5)<br>(D1) only medium, 14d prior flap elevation (n=5) | In vitro: VEGF expression<br><br>In vivo: Flap survival<br><br>Blood vessels quantity (histology and anti-CD31 IHC) | 7 days | McFarlane flap, 2x8 cm           | 80 Sprague-Dawley female rats (200-225g) | Different elevation times after injections – 14, 7, 0 (intra-OP) days prior flap elevation. 10 or 20 locations: 10 locations within the flap and 10 locations in the surrounding wound margin – A (flap alone), B (flap+surrounding), therefore A1A or A1B Each injection delivered 5x10 <sup>5</sup> cells in 0.05 mL. | Blood vessel count (n/HPF):<br>(A1A) 11<br>(A1B) 10<br>(A2A) 13<br>(A2B) 17<br>(A3A) 10<br>(A3B) 11<br>(B?) 11<br>(C?) 11<br>(D?) 10<br>P<0.01 for (A2B) vs. all other |                                                                                                                                         |

|                 |               |                                                |                           |                                                                                                                                                                                                                                                                                                                                                                                                                                                                                                                                                                                                                                                                                                                                                                                                                                                                                                     |           |         |                        |                                           |                                                                                                                                                  |                                                                                                                                                                                                                                                                                                                                              |
|-----------------|---------------|------------------------------------------------|---------------------------|-----------------------------------------------------------------------------------------------------------------------------------------------------------------------------------------------------------------------------------------------------------------------------------------------------------------------------------------------------------------------------------------------------------------------------------------------------------------------------------------------------------------------------------------------------------------------------------------------------------------------------------------------------------------------------------------------------------------------------------------------------------------------------------------------------------------------------------------------------------------------------------------------------|-----------|---------|------------------------|-------------------------------------------|--------------------------------------------------------------------------------------------------------------------------------------------------|----------------------------------------------------------------------------------------------------------------------------------------------------------------------------------------------------------------------------------------------------------------------------------------------------------------------------------------------|
|                 |               |                                                |                           | (D2) only medium, 7d prior flap elevation                                                                                                                                                                                                                                                                                                                                                                                                                                                                                                                                                                                                                                                                                                                                                                                                                                                           |           |         |                        |                                           |                                                                                                                                                  |                                                                                                                                                                                                                                                                                                                                              |
|                 |               |                                                |                           | (D3) only medium, 0d prior flap elevation                                                                                                                                                                                                                                                                                                                                                                                                                                                                                                                                                                                                                                                                                                                                                                                                                                                           |           |         |                        |                                           |                                                                                                                                                  |                                                                                                                                                                                                                                                                                                                                              |
| Spanholtz; 2011 | VEGF-165 bFGF | Increasing ischemic/non-ischemic flap survival | 5 x 10 <sup>6</sup> cells | (A1A) bFBF + VEGF FB into flap alone (F), 14d prior flap elevation (PFE) (n=15)<br>(A1B) bFBF + VEGF FB into flap+surrounding (F+S), 14d PFE (n=15)<br>(A2A) bFBF + VEGF FB F, 7d PFE (n=15)<br>(A2B) bFBF + VEGF FB, F+S, 7d PFE (n=15)<br>(B1A) bFGF FB, F, 14d PFE (n=15)<br>(B1B) bFGF FB, F+S, 14d PFE (n=15)<br>(B2A) bFGF FB, F, 7d PFE n=15)<br>(B2B) bFGF FB, F+S, 7d PFE (n=15)<br>(C1A) non-modified FB, F, 14d PFE (n=15)<br>(C1B) non-modified FB, F+S, 14d PFE (n=15)<br>(C2A) non-modified FB, F, 7d PFE (n=15)<br>(C2B) non-modified FB, F+S, 7d PFE (n=15)<br>(D1A) pAdcos45.GFP FB, F, 14d PFE (n=15)<br>(D1B) pAdcos45.GFP FB, F+S, 14d PFE (n=15)<br>(D2A) pAdcos45.GFP FB, F, 7d PFE (n=15)<br>(D2B) pAdcos45.GFP FB, F+S, 7d PFE (n=15)<br>(E1A) DMEM, F, 14d PFE (n=15)<br>(E1B) DMEM, F+S, 14d PFE (n=15)<br>(E2A) DMEM, F, 7d PFE (n=15)<br>(E2B) DMEM, F+S, 7d PFE (n=15) | Histology | 14 days | McFarlane flap, 2x8 cm | 320 Sprague-Dawley female rats (200-225g) | 40 injection sites; 20 within flap (A – flap alone), 20 in flap surrounding (B -both), subdermal injections, 1 or 2 weeks before flap elevation. | Blood vessel density (/HPF)<br>(A2B) 43**<br>(A2A) 37**<br>(A1B) 33**<br>(A1A) 24<br>(B2B) 29*<br>(B2A) 17<br>(B1B) 24*<br>(B1A) 21*<br>(C/D/E) 5-7<br><br>**P<0.001<br>*P < 0.05 vs. controls<br><br>SMA staining<br>7-9/HPF<br>Statistically significantly higher no of arterial vessels in groups (A2B), (A2A), (A1B) - (9,7,7)<br>P<0.05 |

|              |     |                                   |       |                                                                                                                           |                                                                    |                       |                                |                                                                                                                                                                                     |                                                                                                                                                                                                                                                                                                                                                                                                                                                                                                                                                                               |
|--------------|-----|-----------------------------------|-------|---------------------------------------------------------------------------------------------------------------------------|--------------------------------------------------------------------|-----------------------|--------------------------------|-------------------------------------------------------------------------------------------------------------------------------------------------------------------------------------|-------------------------------------------------------------------------------------------------------------------------------------------------------------------------------------------------------------------------------------------------------------------------------------------------------------------------------------------------------------------------------------------------------------------------------------------------------------------------------------------------------------------------------------------------------------------------------|
| Jafari; 2017 | HGF | Increasing ischemic flap survival | 25 µg | (A) HGF plasmid, 24 hours before surgery (n=5)<br>(B) HGF plasmid, 24 hours after surgery (n=5)<br>(C) no treatment (n=5) | Flap necrosis 7 days (planimetry)<br><br>Doppler<br><br>IHC (qHGF) | McFarlane flap, 3x9cm | 15 Wistar male rats (290-320g) | 4 sites of intradermal injections ( 25µl each) 3 located in the midline within flap, 1 outside ; 8 pulses of 200 V/cm (for 10 msec) using a pulse generator (BTX Gemini X2 System). | Laser Index<br>(A) 57.27±24.65<br>(B) 48.98±4.70<br>(C) 33.96±10.92<br><br>P=0.0317 for (A) vs. (C)<br>P=0.0159 for (B) vs. (C)<br><br>Semiquantitative histology - inflammatory cell score,<br>(A) 1.40±0.15<br>(B) 1.73±0.60<br>(C) 1.80±0.18<br>P = 0.0317 for (A) vs. (C)<br><br>CD31+ vessel density (vessels/mm2)<br>(A) 3.46±0.81<br>(B) 3.31±0.40<br>(C) 1.73±0.62<br>P=0.0079 for (B) vs. (C)<br>P=0.0159 for (A) vs. (C)<br><br>HGF IHS optical density:<br>(A) 2.91±0.05<br>(B) 2.87±0.15<br>(C) 2.42±0.16<br>P=0.0079 for (A) vs. (C)<br>P=0.0079 for (B) vs. (C) |
|--------------|-----|-----------------------------------|-------|---------------------------------------------------------------------------------------------------------------------------|--------------------------------------------------------------------|-----------------------|--------------------------------|-------------------------------------------------------------------------------------------------------------------------------------------------------------------------------------|-------------------------------------------------------------------------------------------------------------------------------------------------------------------------------------------------------------------------------------------------------------------------------------------------------------------------------------------------------------------------------------------------------------------------------------------------------------------------------------------------------------------------------------------------------------------------------|

---



**Table S4.** Multivariate meta-regression model for secondary outcome analysis.

| Variable                                | Effect estimate (95% confidence interval) | p-value       |
|-----------------------------------------|-------------------------------------------|---------------|
| <b>Assessment time</b>                  | <b>1.00 (0.38 to 1.63)</b>                | <b>0.0017</b> |
| Administration time                     | 0.06 (-0.14 to 0.25)                      | 0.57          |
| HGF (intervention) <sup>a</sup>         | 0.48 (-4.95 to 5.92)                      | 0.86          |
| <b>VEGF (intervention) <sup>a</sup></b> | <b>4.85 (0.08 to 9.62)</b>                | <b>0.046</b>  |
| VEGF + FGF (intervention) <sup>a</sup>  | 2.68 (-0.14 to 0.25)                      | 0.57          |

<sup>a</sup> – reference: FGF (intervention)

**Figure S17.** Funnel plot regarding publication bias showing secondary outcome interventions.

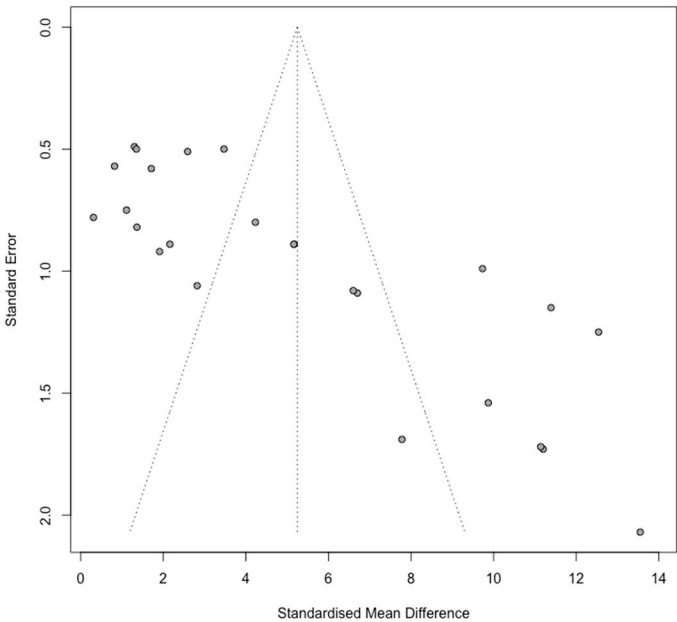

**Secondary outcome – vessels density**

| intercept | 95% CI     | t     | p            |
|-----------|------------|-------|--------------|
| 7.749     | 5.1 – 10.4 | 5.739 | 7.616578e-06 |

Eggers' test indicates the presence of funnel plot asymmetry.

**Table S5.** Table presenting included studies with risk of bias scores, assessed based on SYRCLE Risk of Bias Tool For Animal Studies.

| First author, date     | 1 | 2 | 3 | 4 | 5 | 6 | 7 | 8 | 9 | 10 | SUM (Y=1,<br>N=0) |
|------------------------|---|---|---|---|---|---|---|---|---|----|-------------------|
| <b>MUSCLE FLAPS</b>    |   |   |   |   |   |   |   |   |   |    |                   |
| Neumeister, 2001       | N | Y | N | N | N | N | N | Y | Y | Y  | 4                 |
| de Freitas, 2010       | Y | Y | N | N | N | N | N | N | Y | Y  | 4                 |
| Hijawi, 2004           | N | Y | N | N | N | N | N | Y | Y | N  | 3                 |
| Zhang, 2005            | N | Y | N | N | N | Y | N | Y | Y | Y  | 5                 |
| Rezende, 2010          | Y | Y | N | N | N | N | N | Y | Y | N  | 4                 |
| Antonini, 2007         | N | Y | N | N | N | N | N | N | N | N  | 1                 |
| Zacchinga, 2005        | N | Y | N | N | N | N | N | Y | N | N  | 2                 |
|                        |   |   |   |   |   |   |   |   |   |    |                   |
| <b>MCFARLANE FLAPS</b> |   |   |   |   |   |   |   |   |   |    |                   |
| Liu, 2005 (Liu1)       | N | Y | N | N | N | Y | N | Y | Y | Y  | 5                 |
| Liu, 2004              | N | Y | N | N | N | Y | N | Y | Y | Y  | 5                 |
| Liu, 2005 (Liu2)       | Y | Y | N | N | N | Y | N | Y | Y | Y  | 6                 |
| Holzbach, 2010         | Y | Y | N | N | N | N | N | N | Y | Y  | 4                 |
| Nakagawa, 2007         | N | Y | N | N | N | N | N | Y | Y | N  | 3                 |
| Fujihara, 2005         | N | Y | N | N | N | Y | N | Y | Y | Y  | 5                 |
| Ferraro, 2009          | N | Y | N | N | N | N | N | Y | Y | Y  | 4                 |
| Chang, 2021            | N | Y | N | N | N | Y | N | Y | Y | Y  | 5                 |
| Basu, 2014             | N | Y | N | N | N | N | N | Y | Y | N  | 3                 |
| Yang, 2005             | Y | Y | N | N | N | Y | N | Y | Y | Y  | 6                 |
| Wang, 2006             | N | Y | N | N | N | N | N | Y | Y | Y  | 4                 |
| Jafari, 2017           | Y | Y | N | N | N | N | N | Y | Y | Y  | 5                 |
| Jafari, 2018           | N | Y | N | N | N | Y | N | Y | Y | Y  | 5                 |
| Jafari, 2021           | Y | Y | N | N | N | Y | N | Y | Y | Y  | 6                 |
| Huang, 2006            | N | Y | N | N | N | N | N | Y | Y | Y  | 4                 |
| Rah, 2014              | N | Y | N | Y | N | N | N | Y | Y | Y  | 5                 |

|                         |   |   |   |   |   |   |   |   |   |   |   |
|-------------------------|---|---|---|---|---|---|---|---|---|---|---|
| Liu, 2009               | Y | Y | N | N | N | N | N | Y | Y | Y | 5 |
| Lee, 2011               | N | Y | N | N | N | N | N | Y | Y | Y | 4 |
| Choi, 2020              | N | Y | N | N | N | N | N | Y | Y | Y | 4 |
| Lou, 2021               | Y | Y | N | N | N | Y | N | Y | Y | Y | 6 |
| Gurunluoglu, 2005       | N | Y | Y | N | N | N | N | Y | Y | Y | 5 |
| Giunta, 2005            | N | Y | Y | N | N | N | N | Y | Y | Y | 5 |
| Wang, 2011              | N | Y | N | N | N | N | N | Y | Y | Y | 4 |
| Wang, 2013              | N | Y | N | N | N | N | N | Y | Y | Y | 4 |
| Chen, 2011              | Y | Y | Y | N | N | Y | Y | Y | Y | Y | 8 |
| Rinsch, 2001            | N | Y | N | N | N | N | N | N | Y | Y | 3 |
| Yi, 2006                | N | Y | N | N | N | N | Y | Y | Y | Y | 5 |
| Zheng, 2008             | Y | Y | Y | N | N | N | Y | Y | Y | Y | 7 |
| Spanholtz, 2009         | N | Y | N | N | N | N | N | N | Y | N | 2 |
| Spanholtz, 2011         | N | Y | N | N | N | N | N | N | Y | N | 2 |
| Luo; 2021               | Y | Y | N | N | N | N | N | N | N | N | 1 |
|                         |   |   |   |   |   |   |   |   |   |   |   |
| <b>EPIGASTRIC FLAPS</b> |   |   |   |   |   |   |   |   |   |   |   |
| Michlits, 2007          | N | Y | Y | N | N | N | N | Y | Y | Y | 5 |
| Taub, 1998              | N | Y | N | N | N | N | N | Y | Y | Y | 4 |
| O'Toole, 2002           | N | Y | N | N | N | N | N | Y | Y | Y | 4 |
| Meirer, 2007            | N | Y | N | N | N | N | Y | Y | Y | Y | 5 |
| Lubiatowski, 2002       | N | Y | N | N | N | N | N | Y | Y | Y | 4 |
| Huemer, 2004            | N | Y | Y | N | N | N | N | Y | Y | Y | 5 |
| Huemer, 2005            | N | Y | N | N | N | N | N | Y | Y | N | 3 |
| Jung, 2003              | N | Y | Y | N | N | N | N | Y | Y | Y | 5 |
| Gurunluoglu, 2002       | N | Y | N | N | Y | N | N | Y | Y | Y | 5 |
| Machens, 2002           | N | Y | Y | N | N | N | N | Y | Y | N | 4 |
| Uemura, 2012            | N | Y | N | N | N | N | N | Y | Y | Y | 4 |
| Fu-Gui; 2011            | Y | Y | N | N | N | N | Y | Y | Y | Y | 6 |

|  |  |  |    |   |    |    |    |    |    |   |   |    |      |
|--|--|--|----|---|----|----|----|----|----|---|---|----|------|
|  |  |  | 37 | 0 | 42 | 49 | 49 | 39 | 45 | 7 | 3 | 11 | 4,34 |
|--|--|--|----|---|----|----|----|----|----|---|---|----|------|

**Table S6.** Table presenting summary of findings (SoF) with regards to GRADE Approach for VEGF intervention group.

|                                                                                                                                                                                                                                                                                                                                                                                                                                                                                                                                                                                                                                                                                                                                                                                                                                                                                        |                                                                                       |                                                     |                                                       |
|----------------------------------------------------------------------------------------------------------------------------------------------------------------------------------------------------------------------------------------------------------------------------------------------------------------------------------------------------------------------------------------------------------------------------------------------------------------------------------------------------------------------------------------------------------------------------------------------------------------------------------------------------------------------------------------------------------------------------------------------------------------------------------------------------------------------------------------------------------------------------------------|---------------------------------------------------------------------------------------|-----------------------------------------------------|-------------------------------------------------------|
| <b>VEGF treatment vs control<sup>1</sup></b>                                                                                                                                                                                                                                                                                                                                                                                                                                                                                                                                                                                                                                                                                                                                                                                                                                           |                                                                                       |                                                     |                                                       |
| <b>Patients or population:</b> <sup>2</sup> Laboratory rats (varied strains)                                                                                                                                                                                                                                                                                                                                                                                                                                                                                                                                                                                                                                                                                                                                                                                                           |                                                                                       |                                                     |                                                       |
| <b>Settings:</b> <sup>b</sup> Varied laboratories around the world                                                                                                                                                                                                                                                                                                                                                                                                                                                                                                                                                                                                                                                                                                                                                                                                                     |                                                                                       |                                                     |                                                       |
| <b>Intervention:</b> <sup>b</sup> VEGF gene therapy delivery                                                                                                                                                                                                                                                                                                                                                                                                                                                                                                                                                                                                                                                                                                                                                                                                                           |                                                                                       |                                                     |                                                       |
| <b>Comparison:</b> <sup>b</sup> Sham gene therapy delivery                                                                                                                                                                                                                                                                                                                                                                                                                                                                                                                                                                                                                                                                                                                                                                                                                             |                                                                                       |                                                     |                                                       |
| <b>Outcomes</b> <sup>3</sup>                                                                                                                                                                                                                                                                                                                                                                                                                                                                                                                                                                                                                                                                                                                                                                                                                                                           | <b>Overall improvement (standarised/ non-standarsied mean difference)<sup>4</sup></b> | <b>Number of participants (Studies)<sup>5</sup></b> | <b>Certainty of the evidence (GRADE)*<sup>6</sup></b> |
| <b>Flap survival</b>                                                                                                                                                                                                                                                                                                                                                                                                                                                                                                                                                                                                                                                                                                                                                                                                                                                                   | 15.66% (95% CI 11.80 – 19.52) increase with intervention                              | 927 rats<br>(27 studies)                            | ⊕⊕⊖⊖<br>Low                                           |
| <b>Vessel density</b>                                                                                                                                                                                                                                                                                                                                                                                                                                                                                                                                                                                                                                                                                                                                                                                                                                                                  | 4.80 SMD (95% CI 2.41 – 7.18) increase with intervention                              | unspecified<br>(10 studies)                         | ⊕⊕⊖⊖<br>Low                                           |
| <p>* GRADE Working Group grades of evidence</p> <p><b>High</b> = This research provides a very good indication of the likely effect. The likelihood that the effect will be substantially different<sup>†</sup> is low.</p> <p><b>Moderate</b> = This research provides a good indication of the likely effect. The likelihood that the effect will be substantially different<sup>†</sup> is moderate.</p> <p><b>Low</b> = This research provides some indication of the likely effect. However, the likelihood that it will be substantially different<sup>†</sup> is high.</p> <p><b>Very low</b> = This research does not provide a reliable indication of the likely effect. The likelihood that the effect will be substantially different<sup>†</sup> is very high.</p> <p><sup>†</sup> Substantially different = a large enough difference that it might affect a decision</p> |                                                                                       |                                                     |                                                       |

<sup>1</sup> A title indicating the comparison summarised in the table

<sup>2</sup> The characteristics of the evidence, including the types of participants (patients or populations), types of settings (e.g. countries) where the studies were done, the intervention and what the intervention was compared to

<sup>3</sup> The most important outcomes, including the intended benefits, possible harms and costs

<sup>4</sup> The estimated impact of the intervention on each outcome (preferably provided quantitatively)

<sup>5</sup> The amount of information upon which the information is based, such as the number of participants or units (e.g. facilities), as well as the number of studies

<sup>6</sup> The quality of the evidence for each outcome

**VEGF treatment may improve flap survival and vessel density.**

**Table S7.** Table presenting summary of findings (SoF) with regards to GRADE Approach for FGF intervention group.

| FGF treatment vs control <sup>7</sup>                                                                                                                                                                                                                                                                                                                                                                                                                                                                                                                                                                                                                                                                                                                                          |                                                                                    |                                                |                                                  |
|--------------------------------------------------------------------------------------------------------------------------------------------------------------------------------------------------------------------------------------------------------------------------------------------------------------------------------------------------------------------------------------------------------------------------------------------------------------------------------------------------------------------------------------------------------------------------------------------------------------------------------------------------------------------------------------------------------------------------------------------------------------------------------|------------------------------------------------------------------------------------|------------------------------------------------|--------------------------------------------------|
| <b>Patients or population:</b> <sup>8</sup> Laboratory rats (varied strains)<br><b>Settings:</b> <sup>b</sup> Varied laboratories around the world<br><b>Intervention:</b> <sup>b</sup> FGF gene therapy delivery<br><b>Comparison:</b> <sup>b</sup> Sham gene therapy delivery                                                                                                                                                                                                                                                                                                                                                                                                                                                                                                |                                                                                    |                                                |                                                  |
| Outcomes <sup>9</sup>                                                                                                                                                                                                                                                                                                                                                                                                                                                                                                                                                                                                                                                                                                                                                          | Overall improvement (standardised/ non-standardised mean difference) <sup>10</sup> | Number of participants (Studies) <sup>11</sup> | Certainty of the evidence (GRADE)* <sup>12</sup> |
| Flap survival                                                                                                                                                                                                                                                                                                                                                                                                                                                                                                                                                                                                                                                                                                                                                                  | 3.84% (95% CI 1.13 – 6.55) increase with intervention                              | 281 rats<br>(6 studies)                        | ⊕⊕⊕⊕<br>Very low                                 |
| Vessel density                                                                                                                                                                                                                                                                                                                                                                                                                                                                                                                                                                                                                                                                                                                                                                 | 5.53 SMD (95% CI 2.23 – 8.84) increase with intervention                           | unspecified<br>(5 studies)                     | ⊕⊕⊕⊕<br>Very low                                 |
| <p>* GRADE Working Group grades of evidence</p> <p><b>High</b> = This research provides a very good indication of the likely effect. The likelihood that the effect will be substantially different<sup>†</sup> is low.</p> <p><b>Moderate</b> = This research provides a good indication of the likely effect. The likelihood that the effect will be substantially different<sup>†</sup> is moderate.</p> <p><b>Low</b> = This research provides some indication of the likely effect. However, the likelihood that it will be substantially different<sup>†</sup> is high.</p> <p><b>Very low</b> = This research does not provide a reliable indication of the likely effect. The likelihood that the effect will be substantially different<sup>†</sup> is very high.</p> |                                                                                    |                                                |                                                  |

<sup>7</sup> A title indicating the comparison summarised in the table

<sup>8</sup> The characteristics of the evidence, including the types of participants (patients or populations), types of settings (e.g. countries) where the studies were done, the intervention and what the intervention was compared to

<sup>9</sup> The most important outcomes, including the intended benefits, possible harms and costs

<sup>10</sup> The estimated impact of the intervention on each outcome (preferably provided quantitatively)

<sup>11</sup> The amount of information upon which the information is based, such as the number of participants or units (e.g. facilities), as well as the number of studies

<sup>12</sup> The quality of the evidence for each outcome

<sup>†</sup> Substantially different = a large enough difference that it might affect a decision

**It is uncertain whether FGF treatment improves flap survival or vessel density because the certainty of the evidence is very low.**



**Table S8.** Table presenting summary of findings (SoF) with regards to GRADE Approach for *PDGF* intervention group.

| <b>PDGF treatment vs control<sup>13</sup></b>                                                                                                                                                                                                                                                                                                                                                                                                                                                                                                                                                                                                                                                                                                                                                                                                                                                                                                                                                                         |                                                                                          |                                                      |                                                        |
|-----------------------------------------------------------------------------------------------------------------------------------------------------------------------------------------------------------------------------------------------------------------------------------------------------------------------------------------------------------------------------------------------------------------------------------------------------------------------------------------------------------------------------------------------------------------------------------------------------------------------------------------------------------------------------------------------------------------------------------------------------------------------------------------------------------------------------------------------------------------------------------------------------------------------------------------------------------------------------------------------------------------------|------------------------------------------------------------------------------------------|------------------------------------------------------|--------------------------------------------------------|
| <b>Patients or population:</b> <sup>14</sup> Laboratory rats (varied strains)<br><b>Settings:</b> <sup>b</sup> Varied laboratories around the world<br><b>Intervention:</b> <sup>b</sup> PDGF gene therapy delivery<br><b>Comparison:</b> <sup>b</sup> Sham gene therapy delivery                                                                                                                                                                                                                                                                                                                                                                                                                                                                                                                                                                                                                                                                                                                                     |                                                                                          |                                                      |                                                        |
| <b>Outcomes<sup>15</sup></b>                                                                                                                                                                                                                                                                                                                                                                                                                                                                                                                                                                                                                                                                                                                                                                                                                                                                                                                                                                                          | <b>Overall improvement (standardised/ non-standardised mean difference)<sup>16</sup></b> | <b>Number of participants (Studies)<sup>17</sup></b> | <b>Certainty of the evidence (GRADE)*<sup>18</sup></b> |
| <b>Flap survival</b>                                                                                                                                                                                                                                                                                                                                                                                                                                                                                                                                                                                                                                                                                                                                                                                                                                                                                                                                                                                                  | 13.44% (95% CI 3.53 – 23.35) increase with intervention                                  | 93 rats<br>(4 studies)                               | ⊕⊕⊕⊕<br>Very low                                       |
| <p>* GRADE Working Group grades of evidence</p> <p><b>High</b> = This research provides a very good indication of the likely effect. The likelihood that the effect will be substantially different<sup>†</sup> is low.</p> <p><b>Moderate</b> = This research provides a good indication of the likely effect. The likelihood that the effect will be substantially different<sup>†</sup> is moderate.</p> <p><b>Low</b> = This research provides some indication of the likely effect. However, the likelihood that it will be substantially different<sup>†</sup> is high.</p> <p><b>Very low</b> = This research does not provide a reliable indication of the likely effect. The likelihood that the effect will be substantially different<sup>†</sup> is very high.</p> <p><sup>†</sup> Substantially different = a large enough difference that it might affect a decision</p> <p><b>It is uncertain whether PDGF treatment improves flap survival because the certainty of the evidence is very low.</b></p> |                                                                                          |                                                      |                                                        |

<sup>13</sup> A title indicating the comparison summarised in the table

<sup>14</sup> The characteristics of the evidence, including the types of participants (patients or populations), types of settings (e.g. countries) where the studies were done, the intervention and what the intervention was compared to

<sup>15</sup> The most important outcomes, including the intended benefits, possible harms and costs

<sup>16</sup> The estimated impact of the intervention on each outcome (preferably provided quantitatively)

<sup>17</sup> The amount of information upon which the information is based, such as the number of participants or units (e.g. facilities), as well as the number of studies

<sup>18</sup> The quality of the evidence for each outcome

**Table S9.** Table presenting summary of findings (SoF) with regards to GRADE Approach for HGF/HGF+PGIS intervention group.

| <b>HGF or HGF+PGIS treatment vs control<sup>19</sup></b>                                                                                                                                                                                                                                                                                                                                                                                                                                                                                                                                                                                                                                                                                                                                                                                                                                                                                                                                                                                           |                                                                                           |                                                       |                                                         |
|----------------------------------------------------------------------------------------------------------------------------------------------------------------------------------------------------------------------------------------------------------------------------------------------------------------------------------------------------------------------------------------------------------------------------------------------------------------------------------------------------------------------------------------------------------------------------------------------------------------------------------------------------------------------------------------------------------------------------------------------------------------------------------------------------------------------------------------------------------------------------------------------------------------------------------------------------------------------------------------------------------------------------------------------------|-------------------------------------------------------------------------------------------|-------------------------------------------------------|---------------------------------------------------------|
| <b>Patients or population:</b> <sup>20</sup> Laboratory rats (varied strains)                                                                                                                                                                                                                                                                                                                                                                                                                                                                                                                                                                                                                                                                                                                                                                                                                                                                                                                                                                      |                                                                                           |                                                       |                                                         |
| <b>Settings:</b> <sup>b</sup> Varied laboratories around the world                                                                                                                                                                                                                                                                                                                                                                                                                                                                                                                                                                                                                                                                                                                                                                                                                                                                                                                                                                                 |                                                                                           |                                                       |                                                         |
| <b>Intervention:</b> <sup>b</sup> HGF or HGF+PGIS gene therapy delivery                                                                                                                                                                                                                                                                                                                                                                                                                                                                                                                                                                                                                                                                                                                                                                                                                                                                                                                                                                            |                                                                                           |                                                       |                                                         |
| <b>Comparison:</b> <sup>b</sup> Sham gene therapy delivery                                                                                                                                                                                                                                                                                                                                                                                                                                                                                                                                                                                                                                                                                                                                                                                                                                                                                                                                                                                         |                                                                                           |                                                       |                                                         |
| <b>Outcomes</b> <sup>21</sup>                                                                                                                                                                                                                                                                                                                                                                                                                                                                                                                                                                                                                                                                                                                                                                                                                                                                                                                                                                                                                      | <b>Overall improvement (standardised/ non-standardised mean difference)</b> <sup>22</sup> | <b>Number of participants (Studies)</b> <sup>23</sup> | <b>Certainty of the evidence (GRADE)*</b> <sup>24</sup> |
| <b>Flap survival</b>                                                                                                                                                                                                                                                                                                                                                                                                                                                                                                                                                                                                                                                                                                                                                                                                                                                                                                                                                                                                                               | 5.61% (95% CI 0.43 – 10.78) increase with intervention                                    | 135 rats<br>(3 studies)                               | ⊕⊕⊕⊕<br>Very low                                        |
| <b>Vessel density</b>                                                                                                                                                                                                                                                                                                                                                                                                                                                                                                                                                                                                                                                                                                                                                                                                                                                                                                                                                                                                                              | 1.64 SMD (95% CI 0.84 – 2.43) increase with intervention                                  | unspecified<br>(2 studies)                            | ⊕⊕⊕⊕<br>Very low                                        |
| <p>* GRADE Working Group grades of evidence</p> <p><b>High</b> = This research provides a very good indication of the likely effect. The likelihood that the effect will be substantially different<sup>†</sup> is low.</p> <p><b>Moderate</b> = This research provides a good indication of the likely effect. The likelihood that the effect will be substantially different<sup>†</sup> is moderate.</p> <p><b>Low</b> = This research provides some indication of the likely effect. However, the likelihood that it will be substantially different<sup>†</sup> is high.</p> <p><b>Very low</b> = This research does not provide a reliable indication of the likely effect. The likelihood that the effect will be substantially different<sup>†</sup> is very high.</p> <p><sup>†</sup> Substantially different = a large enough difference that it might affect a decision</p> <p><b>It is uncertain whether HGF or HGF+PGIS treatment improves flap survival or vessel density because the certainty of the evidence is very low.</b></p> |                                                                                           |                                                       |                                                         |

<sup>19</sup> A title indicating the comparison summarised in the table

<sup>20</sup> The characteristics of the evidence, including the types of participants (patients or populations), types of settings (e.g. countries) where the studies were done, the intervention and what the intervention was compared to

<sup>21</sup> The most important outcomes, including the intended benefits, possible harms and costs

<sup>22</sup> The estimated impact of the intervention on each outcome (preferably provided quantitatively)

<sup>23</sup> The amount of information upon which the information is based, such as the number of participants or units (e.g. facilities), as well as the number of studies

<sup>24</sup> The quality of the evidence for each outcome

**Table S10.** Table presenting summary of findings (SoF) with regards to GRADE Approach for VEGF+FGF intervention group.

| VEGF + FGF treatment vs control <sup>25</sup>                                                                                                                                                                                                                                                                                                                                                                                                                                                                                                                                                                                                                                                                                                                                                                                                                                                                                                                                                                                                 |                                                                                  |                                                |                                                         |
|-----------------------------------------------------------------------------------------------------------------------------------------------------------------------------------------------------------------------------------------------------------------------------------------------------------------------------------------------------------------------------------------------------------------------------------------------------------------------------------------------------------------------------------------------------------------------------------------------------------------------------------------------------------------------------------------------------------------------------------------------------------------------------------------------------------------------------------------------------------------------------------------------------------------------------------------------------------------------------------------------------------------------------------------------|----------------------------------------------------------------------------------|------------------------------------------------|---------------------------------------------------------|
| <b>Patients or population:</b> <sup>26</sup> 140 rats (2 studies)<br><b>Settings:</b> <sup>b</sup> Varied laboratories around the world<br><b>Intervention:</b> <sup>b</sup> VEGF + FGF gene therapy delivery<br><b>Comparison:</b> <sup>b</sup> Sham gene therapy delivery                                                                                                                                                                                                                                                                                                                                                                                                                                                                                                                                                                                                                                                                                                                                                                   |                                                                                  |                                                |                                                         |
| Outcomes <sup>27</sup>                                                                                                                                                                                                                                                                                                                                                                                                                                                                                                                                                                                                                                                                                                                                                                                                                                                                                                                                                                                                                        | Overall improvement (standarised/ non-standarsied mean difference) <sup>28</sup> | Number of participants (Studies) <sup>29</sup> | Certainty of the evidence (GRADE)*<br><small>30</small> |
| Flap survival                                                                                                                                                                                                                                                                                                                                                                                                                                                                                                                                                                                                                                                                                                                                                                                                                                                                                                                                                                                                                                 | 8.64% (95% CI 6.94 – 10.34) increase with intervention                           | 140 rats<br>(2 studies)                        | ⊕⊕⊕⊕<br>Very low                                        |
| Vessel density                                                                                                                                                                                                                                                                                                                                                                                                                                                                                                                                                                                                                                                                                                                                                                                                                                                                                                                                                                                                                                | 8.28 SMD (95% CI 4.08 – 12.48) increase with intervention                        | unspecified<br>(2 studies)                     | ⊕⊕⊕⊕<br>Very low                                        |
| <p>* GRADE Working Group grades of evidence</p> <p><b>High</b> = This research provides a very good indication of the likely effect. The likelihood that the effect will be substantially different<sup>†</sup> is low.</p> <p><b>Moderate</b> = This research provides a good indication of the likely effect. The likelihood that the effect will be substantially different<sup>†</sup> is moderate.</p> <p><b>Low</b> = This research provides some indication of the likely effect. However, the likelihood that it will be substantially different<sup>†</sup> is high.</p> <p><b>Very low</b> = This research does not provide a reliable indication of the likely effect. The likelihood that the effect will be substantially different<sup>†</sup> is very high.</p> <p><sup>†</sup> Substantially different = a large enough difference that it might affect a decision</p> <p><b>It is uncertain whether VEGF + FGF treatment improves flap survival or vessel density because the certainty of the evidence is very low.</b></p> |                                                                                  |                                                |                                                         |

<sup>25</sup> A title indicating the comparison summarised in the table

<sup>26</sup> The characteristics of the evidence, including the types of participants (patients or populations), types of settings (e.g. countries) where the studies were done, the intervention and what the intervention was compared to

<sup>27</sup> The most important outcomes, including the intended benefits, possible harms and costs

<sup>28</sup> The estimated impact of the intervention on each outcome (preferably provided quantitatively)

<sup>29</sup> The amount of information upon which the information is based, such as the number of participants or units (e.g. facilities), as well as the number of studies

<sup>30</sup> The quality of the evidence for each outcome
